# Supplementary material
Source: publisher site journal article supplement (https://www.dovepress.com/article/287097)
Supplement: Supplementary file 1 [file get_supplementary_file.php]

**Supplementary Table 1.** Ratings of the severity (1 = absent, 2 = slight, 3 = moderate, 4 = severe) of symptoms from the headache and eye strain scale reported at the end of each night shift for the two lighting conditions.

| **Symptom** | **Traditional lighting**  **Mean ± SD** | **Intervention lighting**  **Mean ± SD** | **p** |
| --- | --- | --- | --- |
| Irritability | 1.48 ± 0.56 | 1.56 ± 0.71 | 0.667 |
| Headache | 1.28 ± 0.45 | 1.24 ± 0.35 | 0.731 |
| Eye strain | 1.98 ± 0.56 | 1.74 ± 0.66 | 0.152 |
| General eye discomfort | 2.04 ± 0.60 | 1.78 ± 0.74 | 0.152 |
| Eye fatigue | 2.20 ± 0.62 | 2.00 ± 0.62 | 0.282 |
| Difficulty focusing | 1.76 ± 0.58 | 1.56 ± 0.74 | 0.234 |
| Difficulty concentrating | 1.80 ± 0.67 | 1.52 ± 0.58 | 0.026 |
| Blurred vision | 1.46 ± 0.54 | 1.46 ± 0.62 | 1.000 |
